# Supplementary material for: Association of candidate genes with drought tolerance traits in diverse perennial ryegrass accessions
Source: PubMed Central journal article supplement — J Exp Bot. 2013 Feb 5;64(6):1537–51. doi: 10.1093/jxb/ert018 (PMC3617828; doi:10.1093/jxb/ert018), 2013-02-05
Supplement: supp_ert018_jexbot087981_file001.pdf [file supp_ert018_jexbot087981_file001.pdf]

## Supplemental Data

The following materials are available in the online version of this article.

**Figure S1.** Quantile-quantile plots of F-test value for model comparisons.

**Figure S2.** Distribution of canopy and air temperature difference (CAD), chlorophyll fluorescence ( $F_v/F_m$ ), leaf water content (LWC), and leaf wilting under well-watered (C) and drought stress (D) conditions, respectively. The values were least square means calculated for all accessions across six environments.

**Figure S3.** Two-dimensional plots of significant correlations ( $P < 0.05$  level) among canopy and air air temperature difference (CAD), chlorophyll fluorescence ( $F_v/F_m$ ), leaf water content (LWC), and leaf wilting under well-watered (C) and drought stress (D) of perennial ryegrass.

**Figure S4.** Distribution of pairwise relative kinship estimates across 192 accessions of perennial ryegrass.

**Figure S5.** LD decay patterns of individual candidate genes of *LpCAT*, *LpChl Cu-ZnSOD*, *LpGPX*, *LpMnSOD*, *LpMDAR*, *LpDHAR*, *LpGR*, *LpFeSOD*, *LpCyt Cu-ZnSOD*, *LpMAPK*, *LpLEA3*, *LpPIP1*, and *LpTIP1* related to plant drought response.

**Figure S6.** Synonymous SNPs did not cause change amino acid sequence for putative *LpFeSOD* in perennial ryegrass.

**Figure S7.** Cleavage site prediction of putative *LpLEA3* gene in perennial ryegrass.

**Figure S8.** Phylogenetic tree of ~500 late embryogenesis abundant group 3 (LEA3) protein sequence from plants.

**Figure S9.** Relationship between chlorophyll fluorescence ( $F_v/F_m$ ) and SNP markers in *LpCyt Cu-ZnSOD*.

**Figure S10.** The sequence similarity of Cyt Cu-ZnSOD between perennial ryegrass and *Arabidopsis*.

**Table S1.** Origin, status information and drought response traits of diverse perennial ryegrass accessions.

**Table S2.** Sampling date, soil moisture, and air temperatures in three locations before and after drought in year 2009 and 2010.

**Table S3.** Repeatability of phenotypic traits of perennial ryegrasses across six environments under the well-watered and drought conditions.

**Table S4.** Information of 109 simple sequence repeat (SSR) primers across seven linkage group of perennial ryegrass.

**Table S5.** Primers used for amplification of 14 candidate genes in perennial ryegrass.

**Table S6.** Analysis of variance (ANOVA) of phenotypic traits of perennial ryegrasses across six environments under the well-watered and drought conditions.

**Table S7.** Summary statistics for all accessions and individual groups (G1 to G5) within the panel of perennial ryegrass accessions identified by STRUCTURE analysis.

**Table S8.** Number of genotypes found in 12 candidate genes of *LpChl Cu-ZnSOD*, *LpGPX*, *LpMnSOD*, *LpMDAR*, *LpDHAR*, *LpGR*, *LpFeSOD*, *LpCyt Cu-ZnSOD*, *LpMAPK*, *LpLEA3*, *LpPIP1*, and *LpTIP1* across 192 accessions of perennial ryegrass.

**Table S9.** Number of associations among 14 genes and traits under drought conditions using simple linear model (S) and population structure (Q) controlled model in perennial ryegrass.

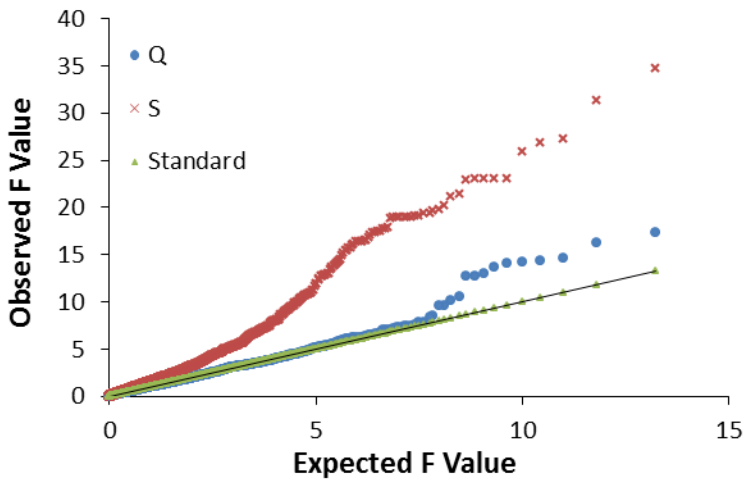

**Figure S1.** Quantile-quantile plots of F-test values for model comparisons. All traits were pooled together including canopy and air temperature difference (CAD), chlorophyll fluorescence ( $F_v/F_m$ ), leaf water content (LWC), and leaf wilting. The solid diagonal lines represent agreement between observed and expected F values. Data points represent ordered F value for each SNP-trait association analyzed with population structure (Q) and simple linear (S) model. These QQ plots of F-tests verified the adequate control of false positives for the Q model because the deviation of the observed F-statistics for 346 SNP markers from the expected value was much smaller than that of the simple linear model.

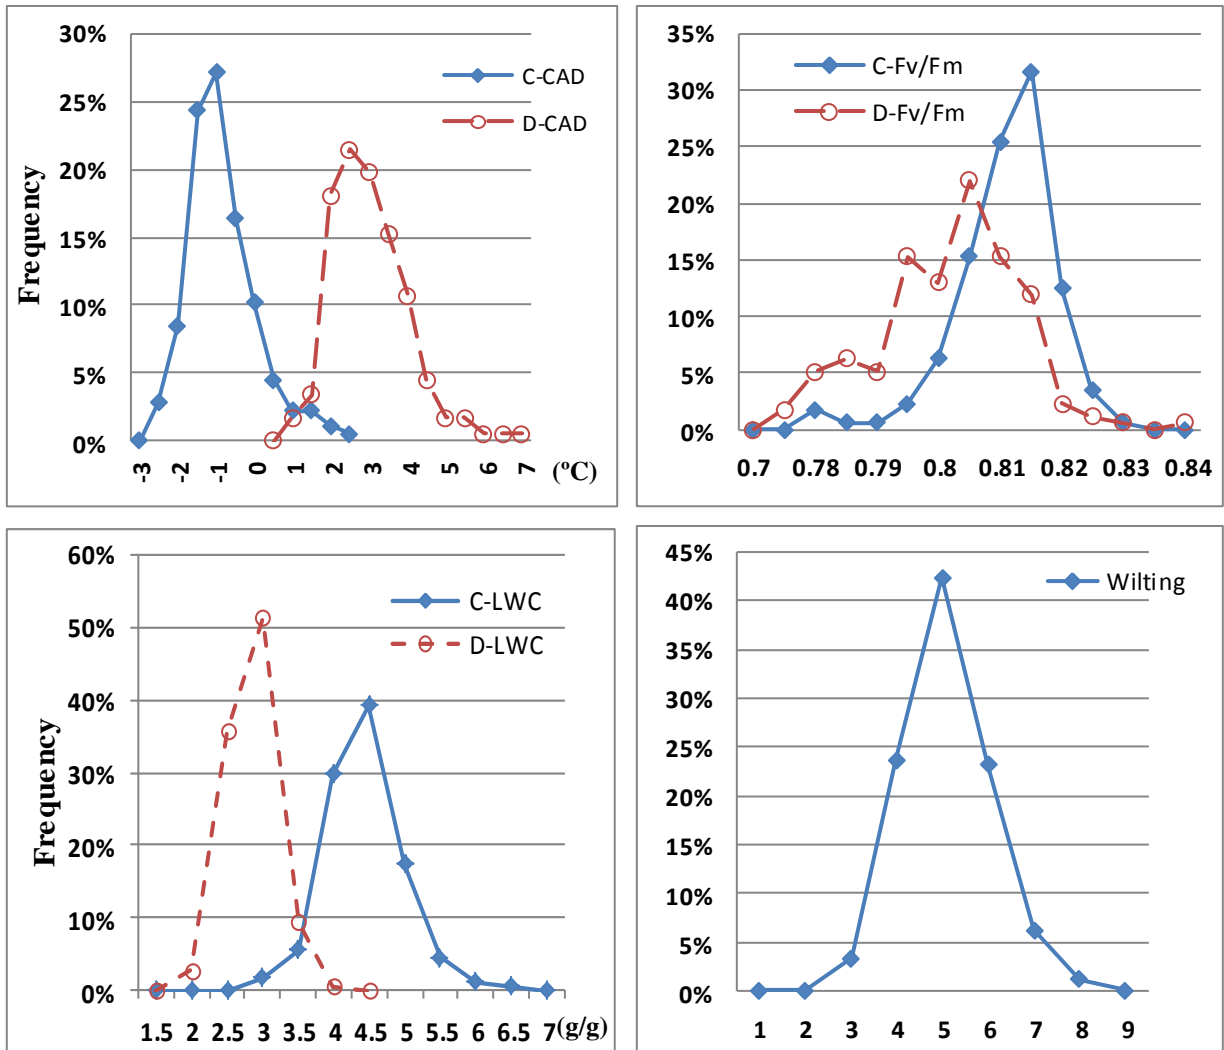

**Figure S2.** Distribution of canopy and air temperature difference (CAD), chlorophyll fluorescence ( $Fv/Fm$ ), leaf water content (LWC), and leaf wilting under well-watered (C) and drought stress (D) conditions, respectively. The values were least square means calculated for all accessions across six environments.

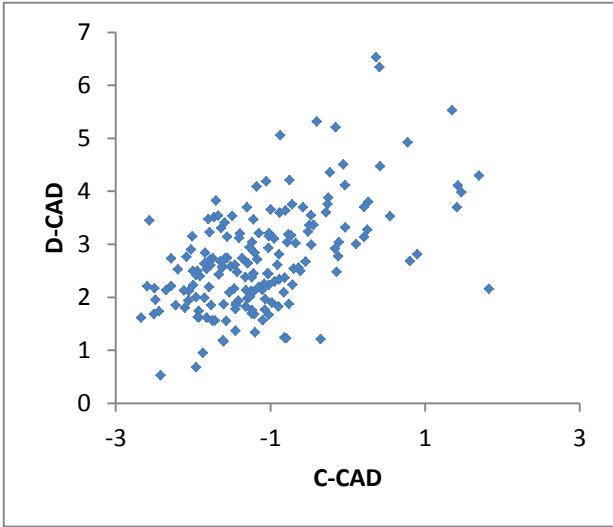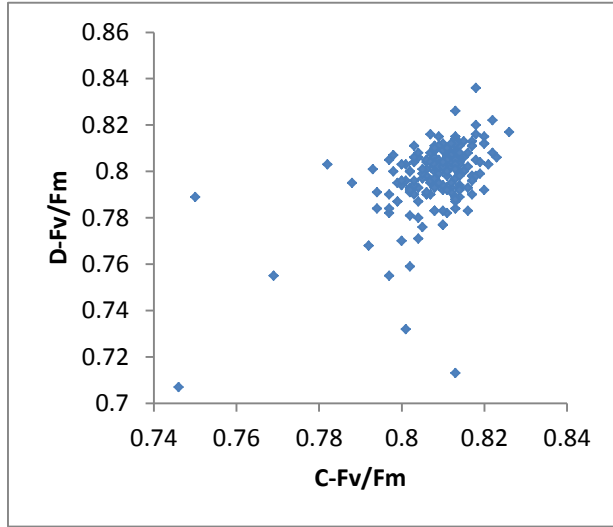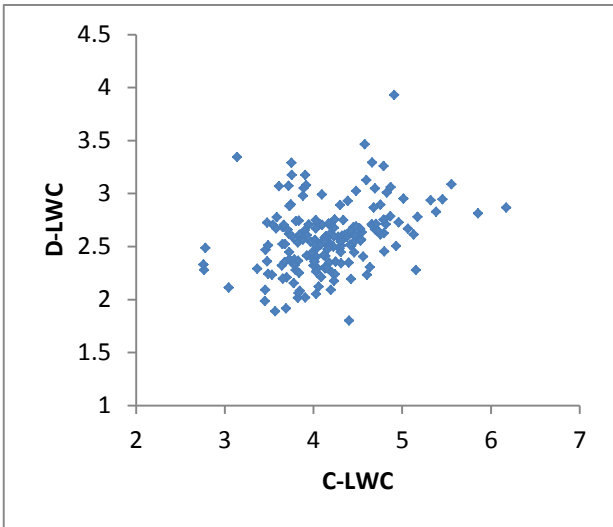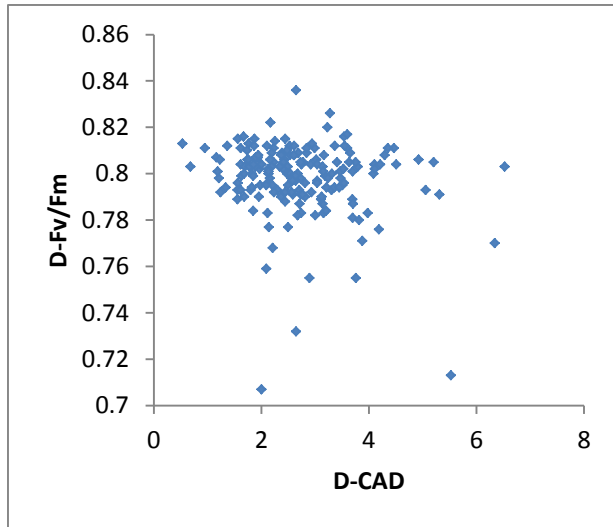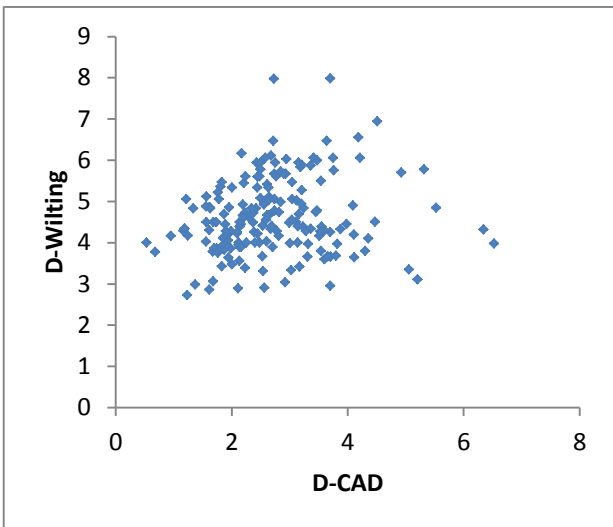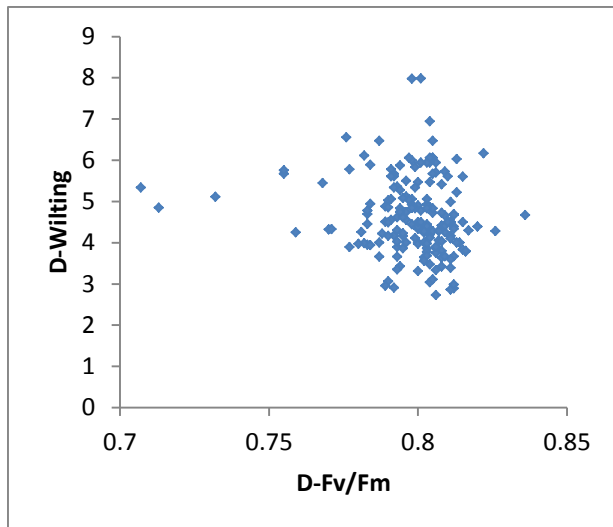

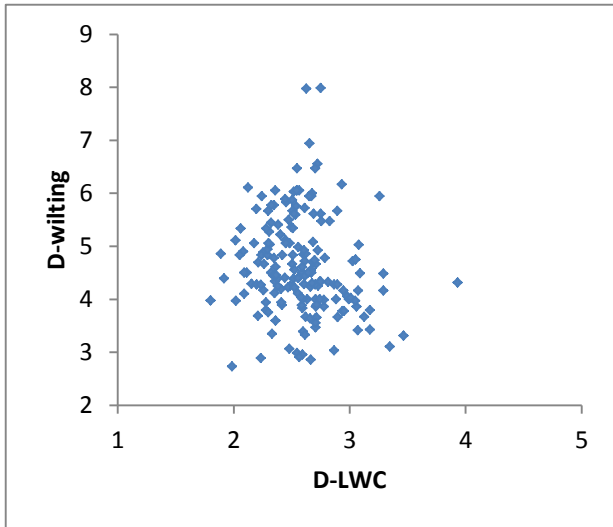

**Figure S3.** Two-dimensional plots of significant correlations ( $P < 0.05$  level) among canopy and air temperature difference (CAD), chlorophyll fluorescence ( $F_v/F_m$ ), leaf water content (LWC), and leaf wilting under well-watered (C) and drought stress (D) of perennial ryegrass.

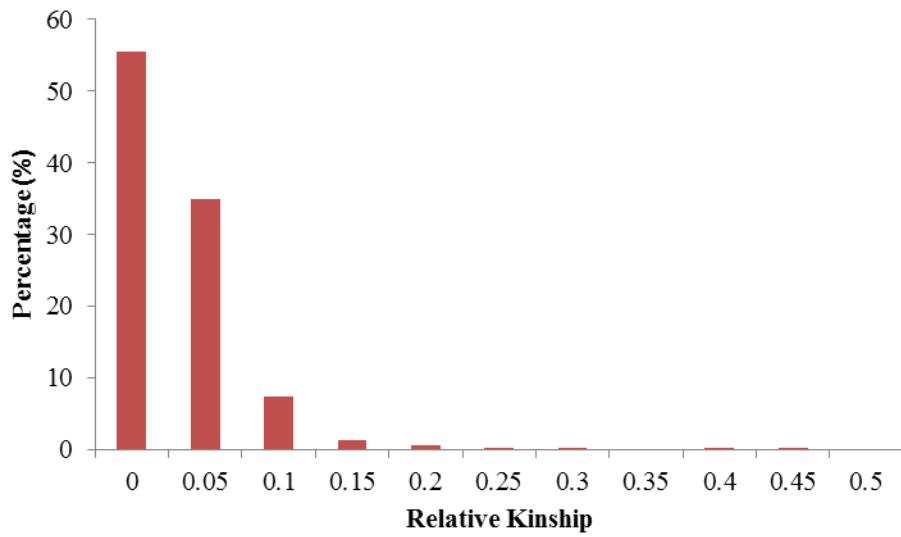

**Figure S4.** Distribution of pairwise relative kinship estimates across 192 accessions of perennial ryegrass. The peak around zero indicates no relationship. Percentages of relative kinship estimates were only shown from 0 to 0.5.

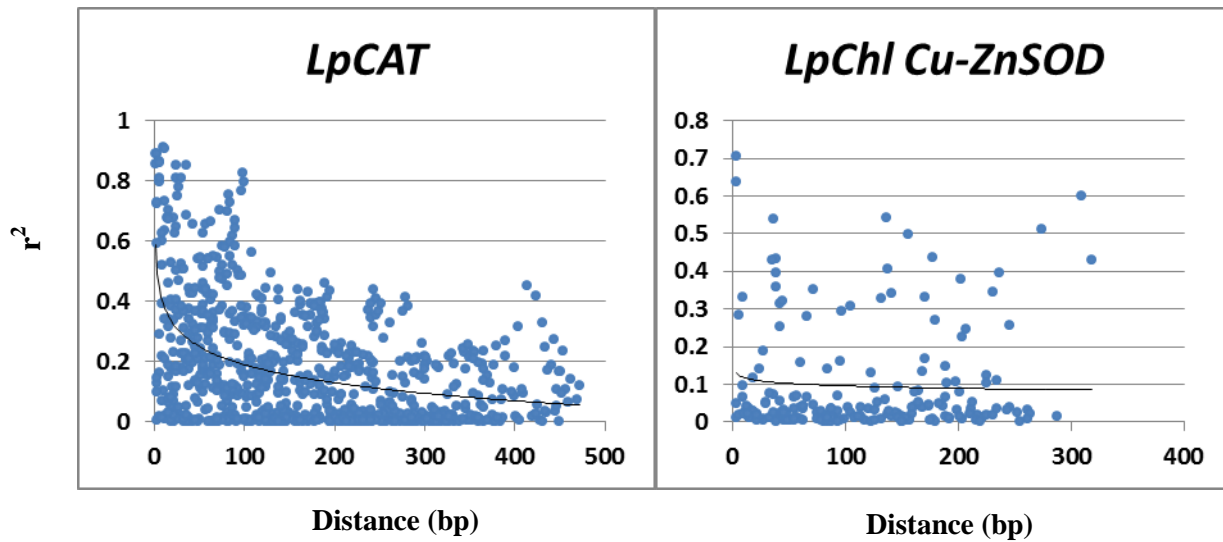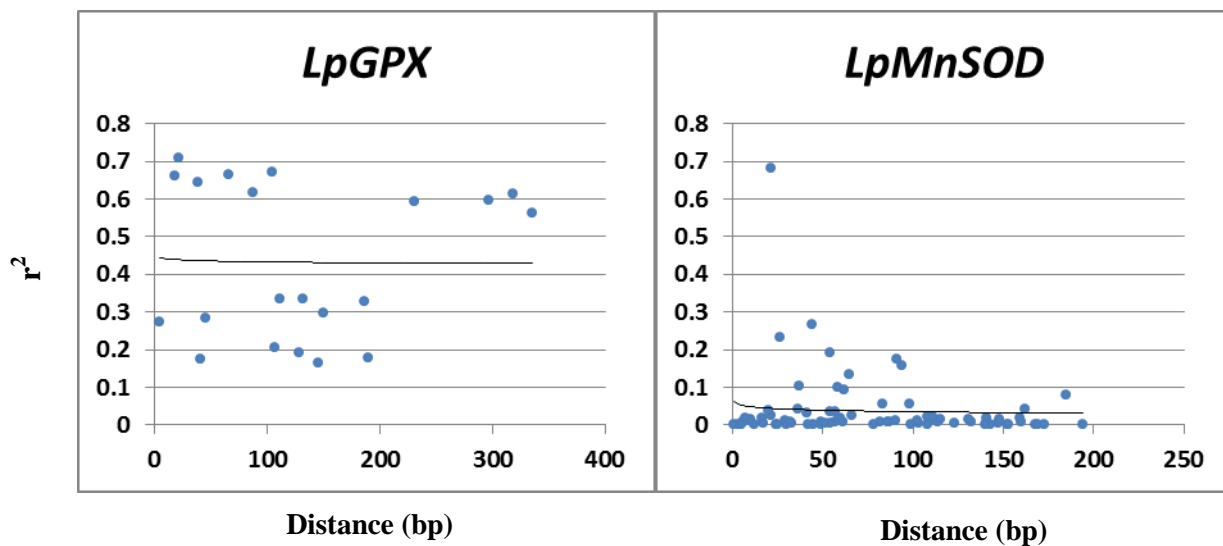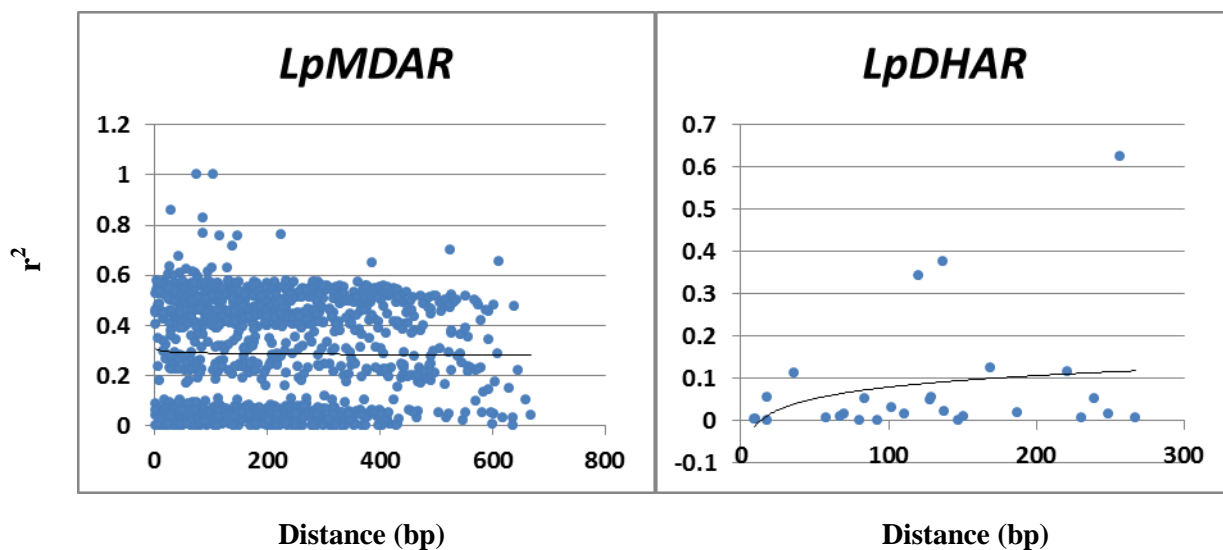



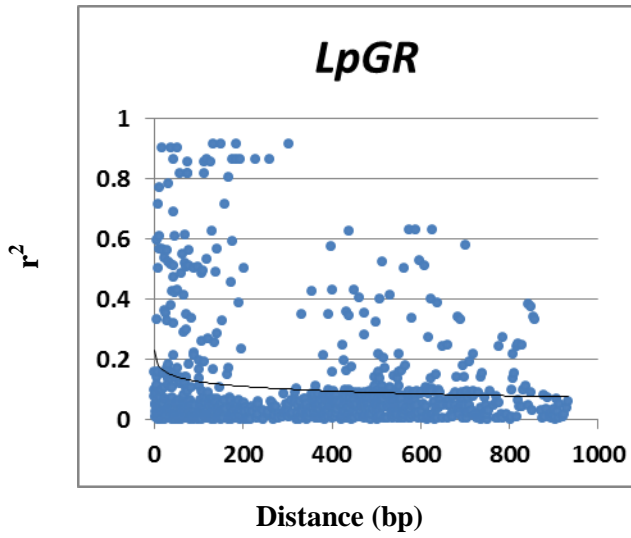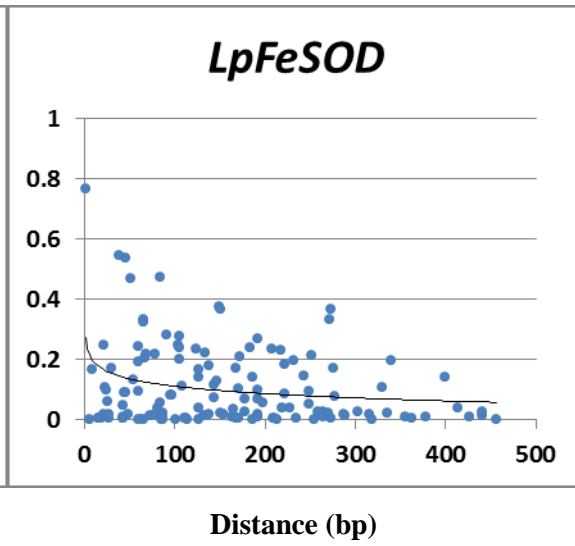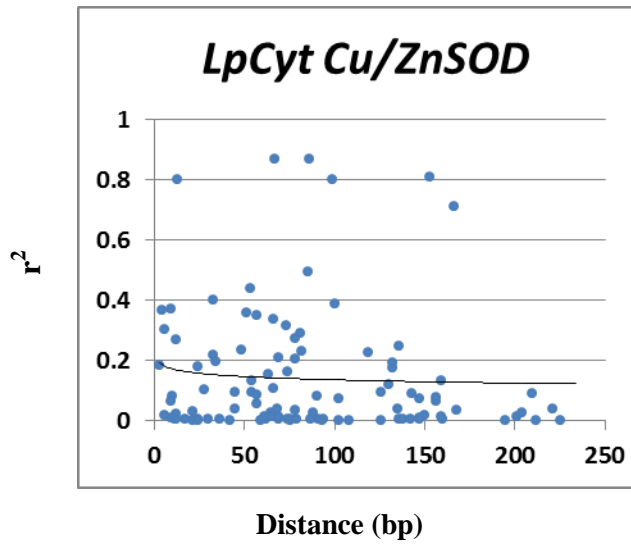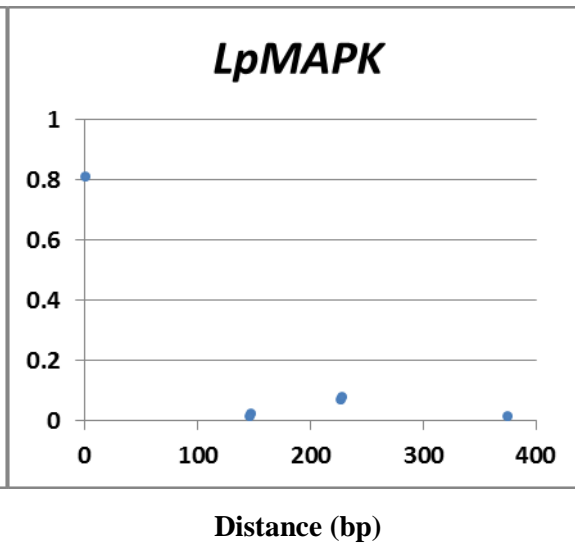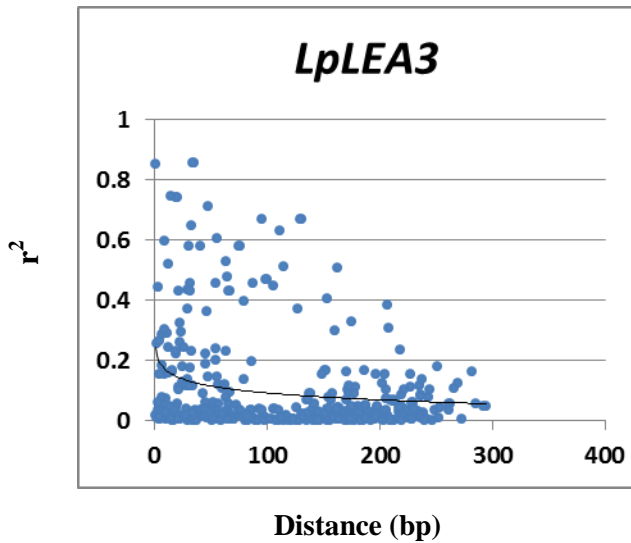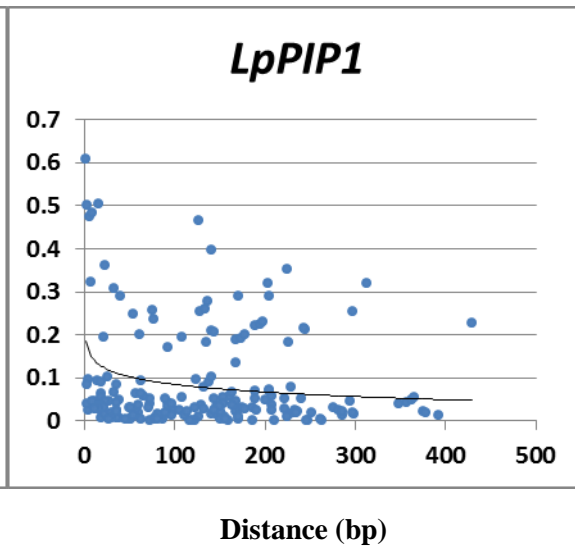

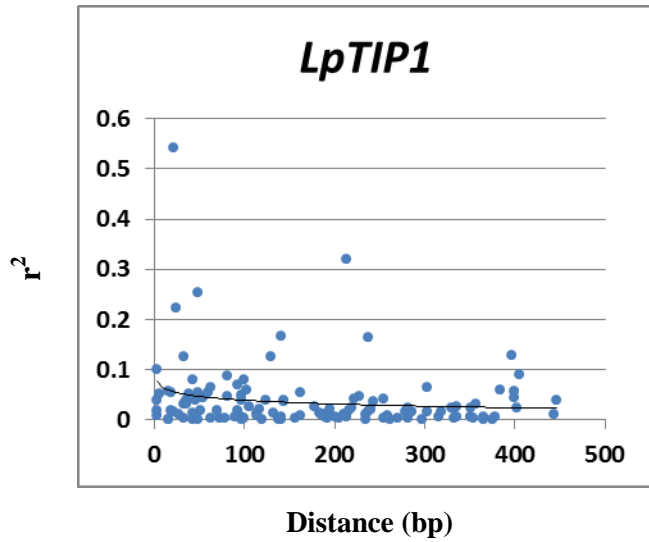

**Figure S5.** Linkage disequilibrium (LD) decay patterns of individual candidate genes of *LpCAT*, *LpChl Cu-ZnSOD*, *LpGPX*, *LpMnSOD*, *LpMDAR*, *LpDHAR*, *LpGR*, *LpFeSOD*, *LpCyt Cu-ZnSOD*, *LpMAPK*, *LpLEA3*, *LpPIP1*, and *LpTIP1* related to plant drought response.

|     |     |                    |               |                     |                |           |         |     |
|-----|-----|--------------------|---------------|---------------------|----------------|-----------|---------|-----|
| GT1 | 575 | KVVSYYGLTTPPYKTDAL | EPYMSKRVV     | LHWGKHQQDYVDGLNKQLD | TSPFYGH        | TLED      | MV      | 396 |
| GT2 | 575 | KVVSYYALTTPPYKPEAL | EPYMSKRTVELH  | HWGKHQQDYVDGLNKQLAT | SFPYGY         | TLEEL     | V       | 396 |
| GT1 | 395 | KEAYNNGNPLPEYNNA   | QVWNHFFWESMQP | GGGGSP              | EAGVLQQIEKDFGS | FANFREE   | EFM     | 216 |
| GT2 | 395 | KEAYNNGNPLPEYNNA   | QVWNHFFWESMQP | PDGGGS              | PEGGVL         | RQIEKDFGS | FFNFREE | EFV |
| GT1 | 215 | LSALSLLGSGVWVWL    | VLKRNERKLSVVN | TRNAINPLAF          | GDIPIIISL      | DLWEHAY   | YLDYK   | DDR |
| GT2 | 215 | RSALSLLGSGVWVWL    | VLKRNEKKLAV   | VRTRNAISPLA         | AGDIPIIISL     | DLWEHAY   | YLDYK   | DDR |
| GT1 | 35  | RAYVSN             | 18            |                     |                |           |         |     |
|     |     | RAYVSN             |               |                     |                |           |         |     |
| GT2 | 35  | RAYVSN             | 18            |                     |                |           |         |     |

**Figure S6.** Synonymous SNPs did not cause change in amino acid sequence for putative LpFeSOD in perennial ryegrass. GT1, genotype 1 of perennial ryegrass LpFeSOD; GT2, genotype 2 of perennial ryegrass LpFeSOD; The corresponding SNP (T/C) in locus 411 resulted in nucleotide change from ACT to ACC, whereas both of these codons are coding amino acid residue threonine (T). Numbers on sequence comparison were nucleoside sequence reference position before they translated into amino acid.

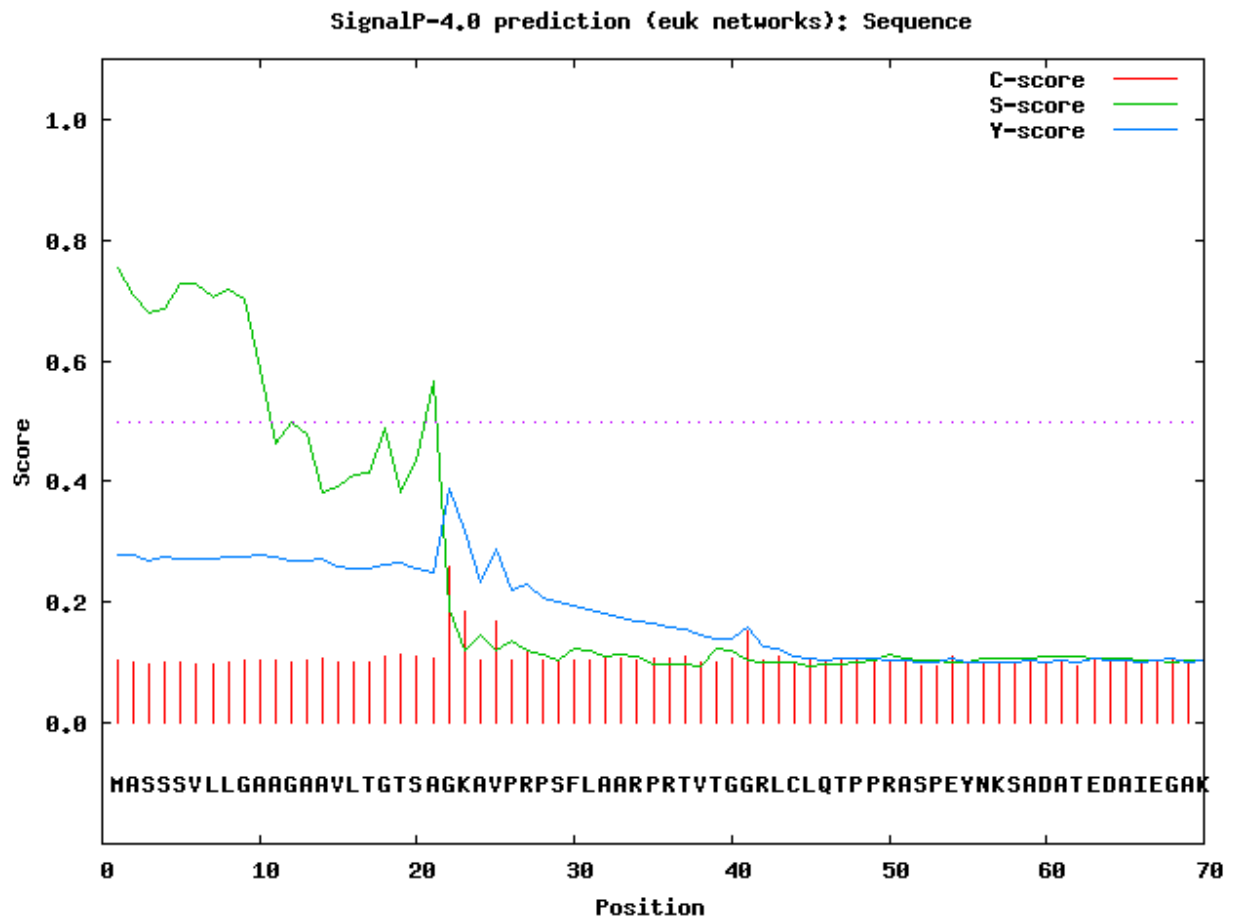

**Figure S7.** Cleavage site prediction of putative *LpLEA3* gene in perennial ryegrass.

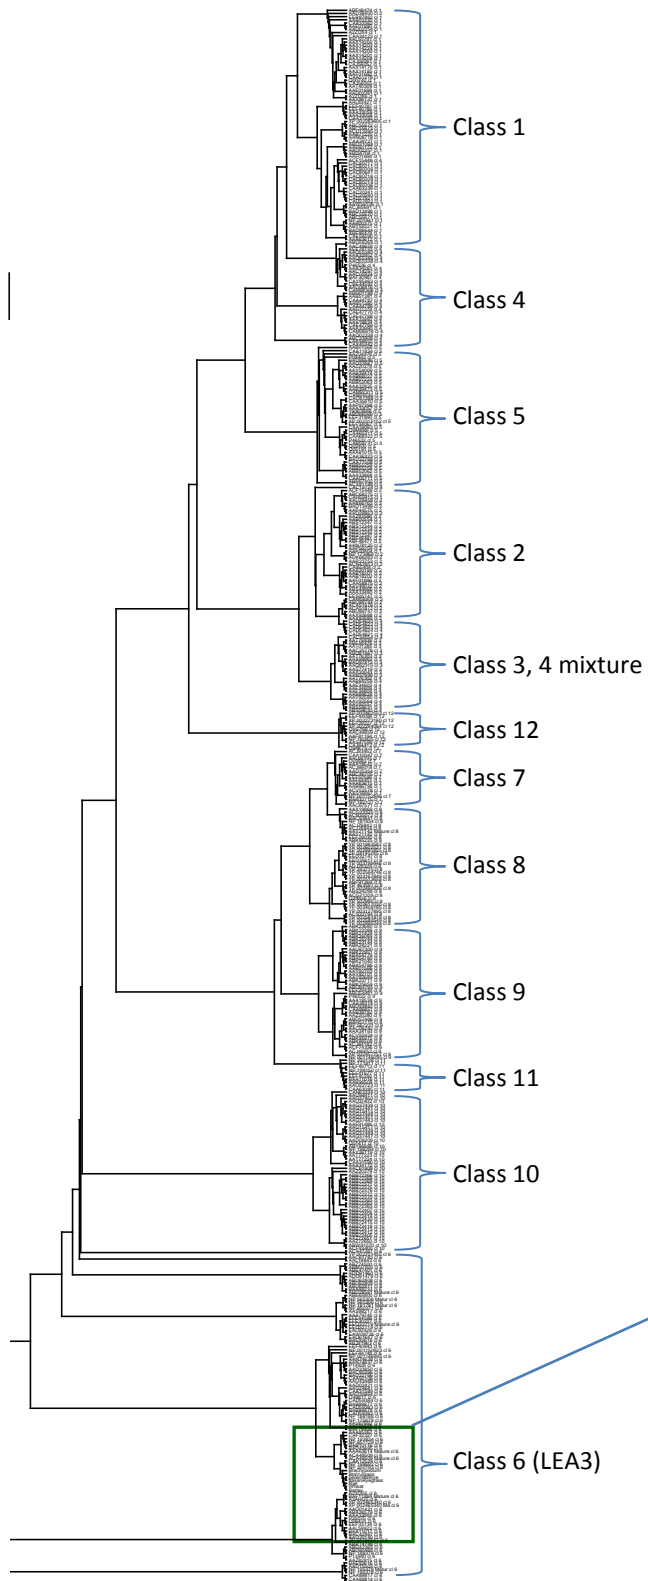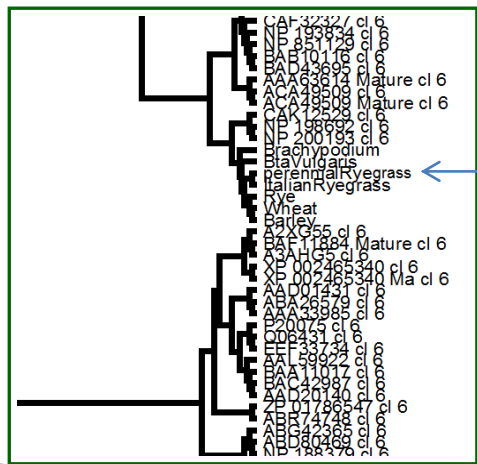

**Figure S8.** Polygenetic tree of ~500 late embryogenesis abundant group 3 (LEA3) protein sequence from plants.

Most LEA proteins from various species were obtained from LEAP database (LEAPdb) reported by Hunault and Jaspard (2010). Class 6 in this data base stood for LEA group 3 protein. Several defined LEA group 3 proteins were also included in this analysis to further confirm the results. These LEA3 proteins were obtained from NCBI, including the following species: wheat (*Triticum aestivum*, NCBI accession number: AAA16282.2), rye (*Secale cereal*, AAM09564.1), barley (*Hordeum vulgare*, ACJ68104.1), Italian ryegrass (*Lolium multiflorum*, BAJ07539.1) and *Brachypodium distachyon* (XP\_003581642.1).

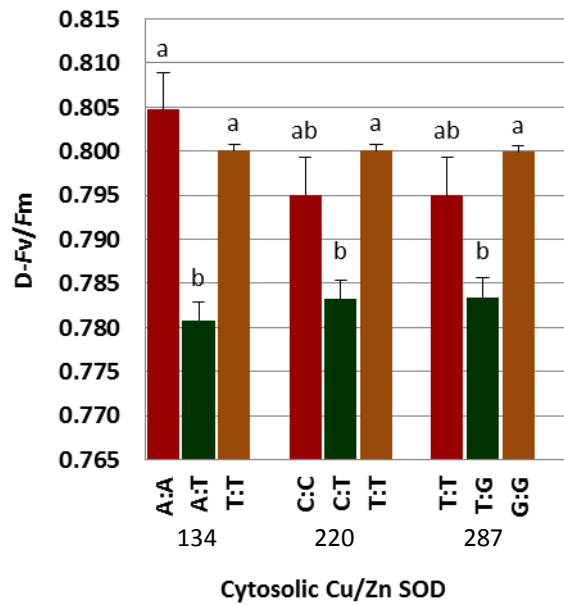

**Figure S9.** Relationship between chlorophyll fluorescence ( $F_v/F_m$ ) and SNP markers in *LpCyt Cu-ZnSOD*. Locus 134, 220 and 287 were significantly associated SNP markers from *LpCyt Cu-ZnSOD* gene with chlorophyll fluorescence under drought stress (D- $F_v/F_m$ ). Means followed by the same letter within a marker position were not significantly different at  $P < 0.05$ . Bars indicate standard error.

```

PR      375  SSEGVKGTIFFFTQEGDGPTTIVTGSVSLKAGLHGFHVHALGDTTNGCMSTGPHFNPAGHV  196
SSEGV-GTIFFTQEGDG-TTV-G-VSGLK-GLHGFHVHALGDTTNGCMSTGPHFNP-G--
AT      10  SSEGVTGTIFFFTQEGDGVTTVSGTVSGLKPGLHGFHVHALGDTTNGCMSTGPHFNPDGKT  69

PR      195  HGAPEDEIRHAGDLGNVTAGEDGVAPINFVDKHIPLTGPHSIIGRAVVVHGDADDLGKGG  16
HGAPED--RHAGDLGN-T-G-DG-A-----D--IPLTGP-SI-GRAVVVH-D-DDLGKGG
AT      70  HGAPEDANRHAGDLGNITVGDDGTATFTITDCQIPLTGPNISIVGRAVVVHADPDDLKGG  129

PR      15   HELS   4
                HELS
AT      130  HELS  133

```

**Figure S10.** The sequence of similarity of Cyt Cu-ZnSOD between perennial ryegrass (PR) and *Arabidopsis* (AT; ID: ABN50366.1). Score = 211 bits (538), Expect = 4e-73 Identities = 99/124 (80%), Positives = 105/124 (85%), Gaps = 0/124 (0%) Frame = -1



**Table S1.** Origin, status information and drought response traits of diverse perennial ryegrass accessions

| ID <sup>a</sup> | Acc <sup>b</sup> | Origin                   | S <sup>d</sup> | Drought <sup>e</sup> |       |           |         | ID <sup>a</sup> | Acc <sup>b</sup> | Origin      | S <sup>d</sup> | Drought <sup>e</sup> |       |           |         |
|-----------------|------------------|--------------------------|----------------|----------------------|-------|-----------|---------|-----------------|------------------|-------------|----------------|----------------------|-------|-----------|---------|
|                 |                  |                          |                | CAD (°C)             | Fv/Fm | LWC (g/g) | Wilting |                 |                  |             |                | CAD (°C)             | Fv/Fm | LWC (g/g) | Wilting |
| 1               | 187222           | Belgium <sup>c</sup>     | U              | 1.24                 | 0.792 | 2.25      | 4.2     | 51              | 231587           | Algeria     | U              | 3.14                 | 0.787 | 2.63      | 4.0     |
| 2               | 197270           | Finland <sup>c</sup>     | CD             | 1.67                 | 0.816 | 2.94      | 3.8     | 52              | 231589           | Algeria     | U              | 4.36                 | 0.811 | 2.09      | 4.1     |
| 3               | 200322           | Denmark <sup>c</sup>     | CD             | 1.68                 | 0.790 | 2.48      | 3.1     | 53              | 231594           | Algeria     | U              | 3.60                 | 0.811 | 2.36      | 3.6     |
| 4               | 202451           | Argentina <sup>c</sup>   | W              | 3.16                 | 0.783 | 2.68      | 4.7     | 54              | 231598           | Greece      | U              | 2.48                 | 0.800 | 2.99      | 4.0     |
| 5               | 204879           | Turkey <sup>c</sup>      | W              | 1.87                 | 0.815 | 2.59      | 3.8     | 55              | 231604           | Portugal    | U              | 4.11                 | 0.804 | 2.41      | 4.2     |
| 8               | 220178           | Afghanistan <sup>c</sup> | W              | 5.53                 | 0.713 | 2.60      | 4.8     | 56              | 231606           | Portugal    | U              | 4.11                 | 0.802 | 2.70      | 3.6     |
| 9               | 229702           | Iran <sup>c</sup>        | W              | 6.34                 | 0.770 | 3.93      | 4.3     | 57              | 231619           | Iran        | U              | 2.11                 | 0.812 | 2.23      | 2.9     |
| 10              | 231569           | Libya <sup>c</sup>       | U              | 2.14                 | 0.777 | 2.42      | 3.9     | 58              | 231620           | Iran        | U              | 2.54                 | 0.800 | 3.46      | 3.3     |
| 11              | 231578           | Algeria <sup>c</sup>     | U              | 2.92                 | 0.804 | 2.87      | 3.0     | 59              | 234779           | Germany     | U              | 1.94                 | 0.807 | 2.98      | 4.1     |
| 12              | 231588           | Algeria <sup>c</sup>     | U              | 4.30                 | 0.808 | 2.28      | 3.8     | 60              | 237184           | Netherlands | CD             | 1.76                 | 0.813 | 2.40      | 5.2     |
| 13              | 231595           | Morocco <sup>c</sup>     | U              | 3.70                 | 0.789 | 2.59      | 3.0     | 61              | 237187           | Netherlands | CD             | 1.17                 | 0.807 | 2.61      | 4.3     |
| 14              | 231597           | Greece <sup>c</sup>      | U              | 1.74                 | 0.806 | 2.78      | 3.9     | 62              | 238938           | New Zealand | U              | 2.45                 | 0.815 | 2.53      | 5.6     |
| 15              | 231605           | Portugal <sup>c</sup>    | U              | 4.93                 | 0.806 | 2.19      | 5.7     | 65              | 251224           | Yugoslavia  | W              | 0.68                 | 0.803 | 2.95      | 3.8     |
| 16              | 251141           | Yugoslavia <sup>c</sup>  | W              | 2.53                 | 0.812 | 2.62      | 3.7     | 66              | 251667           | Yugoslavia  | U              | 1.56                 | 0.793 | 3.01      | 4.0     |
| 17              | 265344           | Ireland <sup>c</sup>     | C              | 3.04                 | 0.797 | 2.48      | 5.1     | 67              | 254898           | Iraq        | W              | 3.32                 | 0.800 | 3.05      | 4.0     |
| 18              | 265351           | Chile <sup>c</sup>       | U              | 2.71                 | 0.793 | 2.59      | 3.9     | 68              | 265336           | Sweden      | C              | 2.99                 | 0.811 | 3.29      | 4.5     |
| 19              | 267059           | Poland <sup>c</sup>      | U              | 2.23                 | 0.811 | 2.60      | 3.4     | 69              | 265340           | France      | C              | 1.80                 | 0.793 | 2.50      | 5.4     |
| 20              | 275660           | Australia <sup>c</sup>   | CD             | 2.67                 | 0.800 | 2.74      | 4.3     | 70              | 265341           | France      | C              | 3.11                 | 0.789 | 2.59      | 4.5     |
| 21              | 287855           | Spain <sup>c</sup>       | U              | 3.70                 | 0.781 | 2.49      | 4.3     | 71              | 265342           | Ireland     | C              | 2.56                 | 0.798 | 2.72      | 4.9     |
| 22              | 298091           | Hungary <sup>c</sup>     | W              | 2.65                 | 0.836 | 2.50      | 4.7     | 72              | 265349           | Ireland     | U              | 3.21                 | 0.794 | 2.30      | 5.3     |
| 23              | 303011           | UK <sup>c</sup>          | C              | 2.19                 | 0.809 | 2.71      | 4.7     | 73              | 266293           | Netherlands | CD             | 1.56                 | 0.815 | 2.32      | 4.5     |
| 24              | 303022           | Netherlands <sup>c</sup> | CD             | 2.84                 | 0.809 | 2.61      | 5.7     | 74              | 267058           | Poland      | U              | 3.41                 | 0.805 | 2.56      | 6.1     |
| 25              | 303031           | Netherlands <sup>c</sup> | CD             | 3.47                 | 0.798 | 2.68      | 6.0     | 75              | 268333           | Former USSR | W              | 3.55                 | 0.812 | 1.92      | 4.4     |
| 26              | 632517           | USA                      | U              | 2.56                 | 0.792 | 2.57      | 2.9     | 76              | 272120           | Poland      | C              | 3.00                 | 0.782 | 2.78      | 4.0     |
| 27              | 403889           | Canada <sup>c</sup>      | C              | 2.53                 | 0.808 | 2.56      | 4.4     | 77              | 274637           | Poland      | U              | 1.97                 | 0.802 | 2.66      | 4.2     |
| 28              | 632542           | Hungary                  | C              | 2.14                 | 0.801 | 2.67      | 4.5     | 78              | Inspire          | USA         | C              | 2.65                 | 0.732 | 2.02      | 5.1     |
| 29              | 418707           | Romania <sup>c</sup>     | W              | 1.98                 | 0.795 | 3.06      | 3.9     | 79              | 277846           | Yugoslavia  | U              | 1.76                 | 0.806 | 2.30      | 3.8     |
| 30              | 418714           | Italy <sup>c</sup>       | W              | 2.73                 | 0.798 | 2.62      | 8.0     | 80              | 277848           | Cyprus      | U              | 1.85                 | 0.784 | 2.41      | 3.9     |
| 31              | 418726           | France <sup>c</sup>      | W              | 3.70                 | 0.801 | 2.75      | 8.0     | 81              | 278773           | Canada      | C              | 2.45                 | 0.788 | 2.47      | 4.2     |
| 32              | 418727           | France <sup>c</sup>      | W              | 2.59                 | 0.791 | 2.52      | 4.6     | 82              | 284823           | Australia   | U              | 2.25                 | 0.814 | 2.71      | 4.0     |
| 33              | 423136           | Spain <sup>c</sup>       | W              | 4.09                 | 0.800 | 2.08      | 4.9     | 83              | 284826           | Australia   | U              | 3.02                 | 0.806 | 2.61      | 3.3     |
| 34              | 462339           | New Zealand <sup>c</sup> | C              | 2.38                 | 0.809 | 2.73      | 4.3     | 84              | 285101           | Australia   | C              | 2.37                 | 0.808 | 3.02      | 4.7     |
| 35              | 182857           | Czech Republic           | U              | 1.21                 | 0.798 | 2.18      | 5.1     | 87              | 290368           | Hungary     | U              | 3.12                 | 0.790 | 3.08      | 5.0     |
| 36              | 189392           | New Zealand              | U              | 1.62                 | 0.804 | 2.62      | 4.9     | 88              | 290373           | Hungary     | U              | 1.19                 | 0.801 | 2.36      | 4.3     |
| 37              | 198070           | Sweden                   | CD             | 2.30                 | 0.793 | 2.36      | 4.6     | 89              | 303012           | UK          | C              | 2.61                 | 0.808 | 2.38      | 5.4     |
| 38              | 204085           | Cyprus                   | U              | 0.95                 | 0.811 | 2.94      | 4.2     | 90              | 303020           | Sweden      | C              | 1.99                 | 0.804 | 2.70      | 4.3     |
| 39              | 204880           | Turkey                   | W              | 3.51                 | 0.795 | 3.07      | 4.2     | 91              | 303021           | Netherlands | CD             | 2.75                 | 0.804 | 2.67      | 5.9     |
| 40              | 220528           | Afghanistan              | W              | 3.31                 | 0.793 | 2.90      | 3.7     | 92              | 303026           | France      | C              | 1.83                 | 0.794 | 3.18      | 3.4     |
| 41              | 220597           | Afghanistan              | W              | 5.21                 | 0.805 | 3.35      | 3.1     | 93              | 303027           | Denmark     | C              | 2.78                 | 0.805 | 2.87      | 4.3     |
| 43              | 225825           | Denmark                  | U              | 2.93                 | 0.792 | 2.89      | 5.7     | 94              | 303028           | Denmark     | C              | 2.23                 | 0.805 | 2.61      | 4.7     |
| 45              | 231565           | Libya                    | U              | 2.12                 | 0.783 | 2.28      | 3.9     | 95              | 636643           | Japan       | CD             | 2.58                 | 0.797 | 2.54      | 6.1     |
| 46              | 231566           | Libya                    | U              | 4.47                 | 0.811 | 2.11      | 4.5     | 96              | 303037           | Sweden      | C              | 1.83                 | 0.800 | 2.83      | 5.5     |
| 47              | 231567           | Libya                    | U              | 1.56                 | 0.789 | 2.25      | 4.9     | 97              | 303044           | Belgium     | CD             | 2.94                 | 0.813 | 2.52      | 6.0     |
| 49              | 231576           | Algeria                  | U              | 2.43                 | 0.806 | 3.26      | 5.9     | 98              | 634204           | USA         | C              | 2.64                 | 0.799 | 2.06      | 5.3     |
| 50              | 231580           | Algeria                  | U              | 1.69                 | 0.803 | 2.71      | 3.9     | 99              | 306292           | Bolivia     | U              | 1.56                 | 0.796 | 2.45      | 5.1     |

**Table S1.** Continued

| ID <sup>a</sup> | Acc <sup>b</sup> | Origin         | S <sup>d</sup> | Drought <sup>e</sup> |       |           |         | ID <sup>a</sup>  | Acc <sup>b</sup>       | Origin      | S <sup>d</sup> | Drought <sup>e</sup> |       |           |         |
|-----------------|------------------|----------------|----------------|----------------------|-------|-----------|---------|------------------|------------------------|-------------|----------------|----------------------|-------|-----------|---------|
|                 |                  |                |                | CAD (°C)             | Fv/Fm | LWC (g/g) | Wilting |                  |                        |             |                | CAD (°C)             | Fv/Fm | LWC (g/g) | Wilting |
| 100             | 311075           | Romania        | U              | 2.64                 | 0.797 | 2.31      | 5.0     | 147              | 577254                 | Luxembourg  | W              | 3.45                 | 0.794 | 3.05      | 4.8     |
| 101             | 317452           | Afghanistan    | W              | 3.36                 | 0.812 | 2.75      | 4.3     | 148              | 577260                 | UK          | W              | 3.75                 | 0.805 | 2.54      | 6.1     |
| 103             | 321397           | Czech Republic | U              | 0.53                 | 0.813 | 2.59      | 4.0     | 149              | 577265                 | UK          | W              | 2.68                 | 0.782 | 2.12      | 6.1     |
| 104             | 321681           | France         | C              | 1.87                 | 0.812 | 2.21      | 4.7     | 150              | 577268                 | UK          | W              | 2.09                 | 0.795 | 2.52      | 4.2     |
| 105             | 340104           | Turkey         | U              | 2.16                 | 0.798 | 2.34      | 4.4     | 151              | 577269                 | Norway      | W              | 4.19                 | 0.776 | 2.72      | 6.6     |
| 106             | 340108           | Turkey         | U              | 2.69                 | 0.809 | 2.44      | 4.4     | 152              | 577273                 | Turkey      | W              | 2.01                 | 0.707 | 2.51      | 5.3     |
| 107             | 371952           | Bulgaria       | U              | 2.12                 | 0.796 | 2.74      | 4.0     | 153              | Manhattan <sup>4</sup> | USA         | C              | 1.94                 | 0.808 | 2.66      | 3.6     |
| 108             | 376878           | New Zealand    | C              | 3.04                 | 0.796 | 2.67      | 4.6     | 154              | 578760                 | USA         | C              | 4.21                 | 0.804 | 2.36      | 6.1     |
| 109             | 384478           | Poland         | C              | 3.04                 | 0.804 | 2.76      | 5.5     | 155              | 578763                 | USA         | C              | 3.20                 | 0.784 | 2.29      | 4.9     |
| 110             | 634205           | USA            | C              | 2.50                 | 0.777 | 2.32      | 5.8     | 156              | 636539                 | Italy       | W              | 3.24                 | 0.798 | 2.42      | 4.8     |
| 111             | 403847           | Canada         | C              | 1.61                 | 0.811 | 2.66      | 2.9     | 158              | 595046                 | UK          | W              | 5.32                 | 0.791 | 2.35      | 5.8     |
| 112             | 403851           | Canada         | C              | 2.48                 | 0.810 | 2.75      | 5.6     | 159              | 598434                 | Italy       | W              | 2.17                 | 0.822 | 2.93      | 6.2     |
| 113             | SilverDollar     | USA            | C              | 2.90                 | 0.755 | 2.30      | 5.7     | 160              | 598437                 | Belgium     | W              | 3.21                 | 0.784 | 2.44      | 5.9     |
| 114             | 403868           | Canada         | C              | 1.85                 | 0.799 | 2.56      | 4.1     | 161              | 598441                 | Switzerland | W              | 3.71                 | 0.787 | 2.71      | 3.7     |
| 115             | 403869           | Canada         | C              | 2.50                 | 0.795 | 2.68      | 5.1     | 162              | 598443                 | Switzerland | W              | 3.14                 | 0.803 | 2.55      | 4.4     |
| 116             | 403886           | Canada         | C              | 3.19                 | 0.799 | 2.45      | 5.8     | 163              | 598447                 | UK          | W              | 2.84                 | 0.811 | 2.56      | 5.0     |
| 117             | 403899           | Canada         | C              | 1.61                 | 0.793 | 2.68      | 4.3     | 164              | 598452                 | UK          | W              | 3.64                 | 0.805 | 2.70      | 6.5     |
| 118             | 403907           | Canada         | C              | 2.49                 | 0.803 | 2.65      | 5.9     | 165              | 598453                 | Romania     | W              | 3.15                 | 0.801 | 2.24      | 5.9     |
| 120             | 418706           | Italy          | W              | 2.13                 | 0.800 | 2.52      | 4.4     | 166              | 598515                 | Turkey      | W              | 3.54                 | 0.816 | 3.17      | 3.8     |
| 121             | 418708           | Romania        | W              | 2.74                 | 0.783 | 2.35      | 4.8     | 167              | 598517                 | Turkey      | W              | 2.13                 | 0.802 | 2.70      | 3.6     |
| 122             | 418712           | Italy          | W              | 2.00                 | 0.804 | 2.70      | 3.5     | 168              | 598518                 | Turkey      | W              | 1.37                 | 0.812 | 2.55      | 3.0     |
| 123             | 418721           | Belgium        | W              | 2.21                 | 0.795 | 2.59      | 4.6     | 169              | 598839                 | Morocco     | W              | 5.06                 | 0.793 | 2.33      | 3.3     |
| 124             | 418722           | Luxembourg     | W              | 1.89                 | 0.803 | 2.61      | 4.4     | 171              | 598877                 | Morocco     | W              | 3.60                 | 0.817 | 2.15      | 4.3     |
| 125             | 418723           | Luxembourg     | W              | 3.36                 | 0.794 | 2.50      | 5.9     | 172              | 598892                 | Morocco     | W              | 3.17                 | 0.808 | 3.07      | 3.4     |
| 126             | 418736           | Switzerland    | W              | 2.60                 | 0.808 | 2.58      | 4.0     | 173              | 598911                 | Tunisia     | W              | 3.28                 | 0.826 | 2.20      | 4.3     |
| 127             | 418741           | France         | W              | 2.16                 | 0.806 | 2.72      | 3.9     | 174              | 598928                 | Italy       | W              | 4.52                 | 0.803 | 1.83      | 6.0     |
| 128             | 420124           | Japan          | C              | 3.88                 | 0.771 | 2.81      | 4.3     | 175              | Divine                 | USA         | C              | 2.10                 | 0.759 | 2.38      | 4.3     |
| 129             | 420126           | Japan          | U              | 2.73                 | 0.805 | 2.51      | 5.7     | 176              | Catalina               | USA         | C              | 2.61                 | 0.812 | 2.26      | 4.7     |
| 130             | 634278           | USA            | W              | 2.44                 | 0.792 | 2.28      | 5.3     | 177              | 600783                 | USA         | C              | 2.74                 | 0.791 | 2.30      | 5.1     |
| 131             | 420128           | Japan          | C              | 2.40                 | 0.802 | 2.88      | 4.0     | 178              | 600878                 | USA         | C              | 1.78                 | 0.803 | 2.45      | 5.1     |
| 132             | BrightStar       | USA            | C              | 2.21                 | 0.768 | 2.32      | 5.4     | 179              | 610802                 | Norway      | W              | 2.77                 | 0.791 | 2.69      | 5.6     |
| 133             | 440474           | Former USSR    | W              | 3.23                 | 0.820 | 2.38      | 4.4     | 180              | 610802                 | UK          | W              | 3.54                 | 0.796 | 2.47      | 5.5     |
| 134             | 462335           | New Zealand    | CD             | 2.81                 | 0.790 | 3.29      | 4.2     | 182              | 610925                 | Tunisia     | W              | 1.23                 | 0.806 | 1.98      | 2.7     |
| 135             | 462336           | New Zealand    | CD             | 1.90                 | 0.807 | 2.89      | 4.3     | 183              | 610926                 | Tunisia     | W              | 6.53                 | 0.803 | 1.80      | 4.0     |
| 136             | 462337           | New Zealand    | CD             | 2.71                 | 0.787 | 2.54      | 6.5     | 184              | 610928                 | Italy       | W              | 3.65                 | 0.809 | 3.13      | 3.7     |
| 137             | 502412           | Russia         | W              | 2.42                 | 0.805 | 2.05      | 4.8     | 185              | 610950                 | Tunisia     | W              | 3.53                 | 0.802 | 2.23      | 4.3     |
| 138             | 504539           | Greece         | W              | 1.95                 | 0.790 | 1.89      | 4.9     | 186              | 610965                 | Italy       | W              | 3.98                 | 0.783 | 2.37      | 4.5     |
| 139             | 505840           | Former USSR    | CD             | 3.47                 | 0.801 | 2.79      | 4.8     | 187              | 611036                 | Russia      | W              | 1.68                 | 0.800 | 2.09      | 4.5     |
| 140             | 505841           | Former USSR    | CD             | 2.19                 | 0.803 | 2.61      | 4.9     | 188              | 619003                 | Norway      | W              | 1.85                 | 0.804 | 2.35      | 4.1     |
| 141             | 505842           | Former USSR    | CD             | 1.63                 | 0.799 | 2.24      | 4.8     | 189              | 619012                 | UK          | W              | 4.51                 | 0.804 | 2.65      | 6.9     |
| 142             | 505843           | Former USSR    | CD             | 2.24                 | 0.792 | 2.52      | 5.6     | 190              | 619474                 | Romania     | CD             | 2.37                 | 0.790 | 3.09      | 4.5     |
| 143             | 516605           | Morocco        | W              | 3.80                 | 0.803 | 2.21      | 3.7     | 191              | 619554                 | UK          | W              | 3.76                 | 0.755 | 2.54      | 5.8     |
| 145             | 547390           | Iran           | W              | 2.81                 | 0.796 | 2.70      | 4.7     | 192              | 628717                 | Bulgaria    | W              | 3.82                 | 0.780 | 2.02      | 4.0     |
| 146             | 577251           | Yugoslavia     | CD             | 2.34                 | 0.803 | 2.29      | 4.8     | LSD <sup>f</sup> |                        |             |                | 1.36                 | 0.023 | 0.60      | 0.97    |

**Table S1 continued**

<sup>a</sup> ID numbers used in this study to represent accessions (discontinuous numbers).

<sup>b</sup> Acc: Accession.

<sup>c</sup> Core collection.

<sup>d</sup> Improvement status obtained from USDA germplasm bank. U: uncertain; W: wild; C: cultivar; CD: cultivated.

<sup>e</sup> Data were lsmeans across six environments under drought stress. CAD: canopy and air temperature difference; LWC: leaf water content; *Fv/Fm*: chlorophyll fluorescence.

<sup>f</sup> Least significant difference.

**Table S2.** Sampling date, soil moisture, and air temperatures in three locations before and after drought in year 2009 and 2010.

| Year | Location     | Sampling date |          | Soil Moisture (%) |      | Temperature [Mean, (min-max)] °C |                  |
|------|--------------|---------------|----------|-------------------|------|----------------------------------|------------------|
|      |              | C             | D        | C                 | D    | C                                | D                |
| 2009 | Wanatah      | 05/30/09      | 07/07/09 | 13.9              | 9.2  | 17.1 (10.6-23.9)                 | 19.7 (14.7-24.4) |
| 2009 | W. Lafayette | 06/09/09      | 07/03/09 | 17.7              | 18.7 | 21.4 (16.2-26.3)                 | 23.3 (18.0-28.6) |
| 2009 | Vincennes    | 06/12/09      | 06/30/09 | 12.2              | 8.0  | 23.7 (19.1-27.9)                 | 27.4 (21.5-33.0) |
| 2010 | Wanatah      | 05/28/10      | 07/07/10 | 14.5              | 11.3 | 22.1 (16.2-28.3)                 | 22.4 (15.9-28.6) |
| 2010 | W. Lafayette | 05/14/10      | 07/03/10 | 20.4              | 17.9 | 15.6 (10.5-20.6)                 | 22.0 (15.2-27.9) |
| 2010 | Vincennes    | 05/23/10      | 07/05/10 | 11.4              | 7.6  | 23.7 (17.9-29.1)                 | 23.8 (17.5-29.9) |

Temperature: control was averaged from 1 week (3 days before sampling, sampling day, and 3 days after sampling); Drought was averaged from irrigation shutdown to sampling date.

C and D represent control and drought stress, respectively.

Wanatah: Wanatah, IN, 41° 26' N and 86° 54' W

W. Lafayette: West Lafayette, IN, 40° 25' N and 86° 54' W

Vincennes: Vincennes, IN, 38° 40' N and 87° 31' W

**Table S3.** Repeatability of canopy and air temperature difference (CAD), chlorophyll fluorescence ( $F_v/F_m$ ), leaf water content (LWC), and leaf wilting of perennial ryegrasses across 6 environments under both the well-watered (C) and drought conditions (D).

| Treatment | Trait     | $h^2$ |
|-----------|-----------|-------|
| C         | CAD       | 0.64  |
|           | $F_v/F_m$ | 0.70  |
|           | LWC       | 0.51  |
| D         | CAD       | 0.63  |
|           | $F_v/F_m$ | 0.72  |
|           | LWC       | 0.64  |
|           | Wilting   | 0.86  |

**Table S4.** Information of 109 simple sequence repeat (SSR) primers across seven linkage group of perennial ryegrass.

| SSR      | Forward primer         | Reverse primer        | Linkage group | SSR motif         | Number of allele <sup>a</sup> |
|----------|------------------------|-----------------------|---------------|-------------------|-------------------------------|
| LpSSR006 | CAATGGAGTCCCAACAG      | TACCTGGGCAAATCTTG     | 4             | (CT)23            | 25                            |
| LpSSR011 | AAATGTTTCATCGTATCG     | CAGGTCCCTGCTTAC       | 4             | (CA)15(CA)9       | 35                            |
| LpSSR017 | TGAGCACCATGAAGGAG      | GGTTGTCCGCAGGTATT     | 7             | (GA)26(GA)2(GA)2  | 31                            |
| LpSSR020 | GGGAAAATACAGTTCTGC     | GATGCTCCTGCCTACTTAA   | 5             | (GA)5(GA)2(GA)16  | 27                            |
| LpSSR021 | AACAAGTCAATGGACAGATT   | TTTGTTCCTTTTGG        | 2             | (GA)21            | 28                            |
| LpSSR023 | ATGCACGGGTTTTATTCATT   | CGCGAGGCTTAAGGTGT     | 4             | (GT)4(GT)19(GA)23 | 46                            |
| LpSSR027 | CACCACCTTCTCCAAC       | AACAAGCACTTAGGAACA    | 1             | (CT)17            | 34                            |
| LpSSR057 | TAGCCTCCAGAAACAAAGTC   | CATAGCAGTACAGCCAGTCA  | 1             | (GA)21            | 35                            |
| LpSSR058 | CGATGAACTCAAGGGGGATT   | GCACCGGTCTAGGGACAGAA  | 6             | (GA)14            | 34                            |
| LpSSR059 | GATCGGATCGGTACAGGAGA   | GAAGCGCACCTTCTGTTTCT  | 5             | (CT)20            | 33                            |
| LpSSR066 | GCCAGTGCCCATCCGATAA    | CCCCACTCCAACCAAAGCAA  | 7             | (TG)24            | 42                            |
| LpSSR076 | CCCATACTTCGAGGCATAAA   | AAATTCCTCCATCAGAGAAC  | 2             | (CA)28            | 27                            |
| LpSSR082 | CTAACTAAATGTTTCATCGT   | CCTGCTTACTCCTGTT      | 4             | (CA)25            | 32                            |
| LpSSR085 | GCCAGATCCCTTGTAAGAG    | GCACCATTTAAAACCAAAGA  | 1             | (CA)47            | 26                            |
| LpSSR091 | CACTCTCGGTCTCGCCTTAT   | TTCGCATGCATACAACACAT  | 7             | (TG)25            | 23                            |
| LpSSR100 | AATACTTGAGTTGGCATTTC   | CGGCTCACTGAACATTC     | 3             | (TG)8(TG)2        | 7                             |
| LpSSR112 | GACCCGAGACAGCCTA       | ACGCATATGGTCTTCAGAA   | 2             | (CA)20            | 18                            |
| DLF008   | CCGTTGCTTGATACTTGGAC   | GAACGAGCATTCTCCTTTCT  | 7             | (ACT)7            | 13                            |
| DLF013   | GTAGTCCAGCGGAGGTCAAT   | ATAGCAAACGTTGGCACACAT | 3             | (GTT)6(GCT)3      | 3                             |
| DLF020   | ATGACGACGAGGAGGAAT     | ATAGCGACGAGAGAAAGGTA  | 7             | (CGA)5            | 27                            |
| DLF025   | CGGCGAGAAGCTAACAGA     | TCACGGAGAGGGCAAGT     | 4             | (CT)10            | 13                            |
| DLF027   | CGCTTTGTCAACTCATAACC   | CAAACCCGTTCTTCTACATT  | 1             | (TA)11            | 6                             |
| rye012   | GGTCTAATTGTCGTCTTTTC   | GAGTGATTTGGAGGTGAGAA  | 4             | (CA)23            | 29                            |
| rye014   | CTGCTCTGTGTTTGTGTGAC   | GCCTTTCATCGTTACTGTCT  | 6             | (CA)26            | 18                            |
| uni001   | AGCCACACTTTACCTAATGCTG | CCCGCAAAACTTACAATTA   | 3             | (AC)17            | 21                            |
| B1A2     | GTGCAGCAGTTTGAATTGGA   | AGCATCGGGAGCTATGAATG  | 3             | (GA)14            | 38                            |
| B1A8     | GACTTTCAGGCATCGGTCAT   | CCCAGCTCCATTCTTAATGC  | 6             | (TG)7             | 22                            |
| B1A10    | GCGACAGGAGTGAACACTGA   | TAAGGCGTAAGGCAGCAGTG  | 3             | (CA)12            | 23                            |
| B1B3     | AGGTGTCTGTTGCTTTGGA    | TTTACCCCGAGGATCAAAT   | 3             | (TG)7             | 15                            |
| B1B6     | GGAGTGCATCTTTCTTGCT    | GCAAACCCAGACACCCATTA  | 1             | (CTT)4(GT)2       | 12                            |
| B1C8     | TTCTGGCCATGTTGATTTGC   | GTCTACGGGTTGGAGCAGTG  | 7             | (CA)8(CT)6        | 7                             |
| B1C9     | GAGCCGATGCACAGGTTACT   | AAAGGAAGCCGGCTAATCAC  | 3             | (CT)8             | 28                            |
| B2F1     | CCAACCATATGCAACGATGA   | TCCATTTGTTCTTGGGGAGA  | 5             | (CA)5             | 7                             |
| B2G6a    | CCAACCTAGACAAAGGGGATTG | GGAGAGCACCATTCATCCAT  | 1             | (TGA)8            | 24                            |
| B3A1     | CTTGTCGTCCTTGTGGGAG    | ATATTCTGGATCGTGGCGTT  | 2             | (AC)5(AG)5        | 12                            |
| B3A3     | GGGTGAAGTGCTCTTTGTGA   | ATGGTGAAGGCCTGAAACTG  | 7             | (GT)8             | 6                             |
| B3B7     | AGGCGACCAATACGTCTGTC   | ATCTCTGATGGCTTTGTGGC  | 1             | (TG)9             | 8                             |
| B3B8     | TGTCATGTCCGCTGTCTACG   | GAGAGTGGGCGATCATCTTC  | 3             | (TG)10            | 15                            |
| B3C5     | TGTCATGTTCCAGAAAGTGCG  | TGTCCACATAAATGCACCTCA | 7             | (GT)8             | 13                            |
| B3C10    | CTACAACCTCCGTGCTGCTGA  | TGCATGGTTTCTCAAATGCT  | 7             | (CTC)4            | 10                            |
| B3C11    | ATTCACCTCGCTCGAAAATG   | AACACCAAGCTAGCCACCAC  | 7             | (CATG)3(TG)9      | 7                             |
| B3D2     | ATACGAGCGAATTGCCTCTC   | TCTCCCATCGCTTATGTCC   | 1             | (AT)4             | 6                             |
| B3D4     | AAACCATAACCGACATACCG   | GGCGTCTGTGAGAGTGAGTG  | 6             | (CG)4             | 8                             |
| B3D12    | GGGCATCACTGAGAAGAGGA   | TACAAAGGAAGTCGGGCATC  | 2             | (TC)7             | 10                            |
| B3E6     | CTGTAACAACAGCCGCTGAG   | GTCTCGAGCACAGGAGTTCA  | 3             | (AG)4(GT)7        | 5                             |

**Table S4. Continued**

| SSR         | Forward primer         | Reverse primer           | Linkage | SSR motif       | Number of allele <sup>a</sup> |
|-------------|------------------------|--------------------------|---------|-----------------|-------------------------------|
| B4C4        | TGCATGCACCCTTGTAGC     | GGAGACTTTGTGTGTGCAGC     | 7       | (GT)4(GT)3(TC)3 | 15                            |
| B4D7        | CGGGAGCTCTCTCTCCTTCT   | TCCAGAACCTTCTCGAGGTC     | 1       | (CT)10          | 27                            |
| B4D9        | GACGTCATACCTGCGTGCTA   | GCGAATCAAAGAAGCATGTG     | 4       | (TC)10(TC)4     | 16                            |
| B5E1        | AAACATCAACGGAAGGATGC   | TGATATGCATTGTGATGGAGG    | 5       | (CA)3(CA)5      | 9                             |
| B5G4        | TGGAGTTGTGGACCTTTTCC   | AGATGCTGGTTGGTTTCCAG     | 7       | (CA)8           | 6                             |
| LPSSRH01A02 | AAAGACCGCATACGAAAGT    | AACCAAAGCCTCAAGACA       | 5       | (CA)27          | 27                            |
| LPSSRH01E10 | CGCAGCTTAATTTAGTC      | GCTTTGAGTATGTAAAGTT      | 4       | (CA)6           | 7                             |
| LPSSRH01H06 | ATTGACTGGCTTCCGTGTT    | CGCGATTGCAGATCTTG        | 4       | (CA)9           | 16                            |
| LPSSRH02C11 | TGGAATAACGATGAAAAF     | CATCACGAATTAACAAGAG      | 3       | (CA)4(CA)4      | 16                            |
| LP165       | CCATCACCTCCACTAT       | AGCTCGCAGTCTGTTG         | 7       | (CT)14          | 21                            |
| LP20a       | ACCGCTGTGCTAAATCTG     | ATGCGCTGCTGTCTGCCCT      | 4       | (GA)16(A)5(GA)  | 23                            |
| LP204a      | GAGCTTCTCTCGATCCT      | AGTGGATGTGACTACA         | 4       | (CT)20          | 14                            |
| LP8a        | TGACTTCTCTCGATCCT      | ATGTGACTACAAAACCA        | 4       | (CT)17          | 10                            |
| M10138      | TAGAGGATCAGTTGCATC     | TAGTCCGAGTTAGCTGA        | 3       | (CA)13          | 31                            |
| M144        | CAGAAGGAGGTCGTCGA      | CTGAAACCTAGGCTATCTGAG    | 4       | (CT)16          | 22                            |
| M15185      | GGTCTGGTAGACATGCCTAC   | TACCAGCACAGGCAGGTTTC     | 2       | (GA)5(GA)17     | 34                            |
| M16B        | TGCTGTGGCTCTTGTGAC     | AGCCGAGGCTCAGCTCGA       | 1       | (GA)28          | 23                            |
| M4213       | CACCTCCCCTGCATGGCATGT  | TACAACGACATGTCAAGGT      | 1       | (GT)9           | 10                            |
| PR3         | GTATAGTACCCATTCCGT     | GCCGCCCTGCCATGCTG        | 2       | (CA)22          | 26                            |
| PR8         | AGGGTTCGTCTGCATTC      | GCCGTCGCACCCCTG          | 1       | (GT)22          | 16                            |
| PR14        | CCTTTTCGCCCTTCGTA      | CACCAACATTGCCGAGTG       | 4       | (GT)12          | 14                            |
| PR24        | TGCTGTGATGCTGAATG      | GTATAGTACCCATTCCGTTGTC   | 2       | (GT)16          | 15                            |
| PR25        | AGGGTTCGTCTGCATTC      | CCTGCATACATTCATCCA       | 1       | (GT)15          | 17                            |
| PR37        | TCTGCATTCGTTGTCTCACTG  | GAGCCGTCGCACCCCTG        | 1       | (GT)18          | 17                            |
| PR39        | CATTCATCCACGTTAGAC     | CTTCCACGACTGCTTC         | 1       | (CA)17          | 20                            |
| PRE         | CATTCATCCACGTTAGAC     | GTTAGGTTTCGTCTGCAT       | 1       | (CA)12          | 25                            |
| PRG         | GCCGAGTGCATCAAGGT      | CTTTTTCGCCTTCGTA         | 4       | (CA)13          | 11                            |
| LP194       | GCGTAAGAGAGAGGGCGAT    | ACGTATGTCCAACAGGT        | Unknown | (GA)10GG(GA)G   | 20                            |
| M844        | TAGCTTTCTATGCAAAGCT    | CACTTCACTTTTCTTGCA       | Unknown | (GT)8           | 15                            |
| PR10        | CTTCTAATCCCTCGCCT      | TGCCGAGTGCATCAAGGT       | Unknown | (GT)2GG(GT)11   | 16                            |
| rv0913      | GGCTTACAGCGAAGAAGACATT | CAGTTGAGCTCATTGGAGACAC   | 1       | (CT)9           | 19                            |
| rv0659      | TCTCTCAAAGTTCCTTCTCTGC | TCTGCTCCATCAAGAAAGGTT    | 1       | (CT)19(CA)11    | 33                            |
| rv0244      | CAGATTGCAACTCACGAGGA   | ATTTTCCCGTCTGTATTGCG     | 1       | (CT)21          | 22                            |
| rv0959      | GTAAACTGGGTTGATGGGATGT | CATTGTACGATTTATGCTTCTCCA | 2       | (TAA)9          | 24                            |
| rv0706      | TTCATGTTAGCCCTCCTGTTTT | AATCAAGCCATCTCGTCTCTA    | 2       | (CT)18          | 28                            |
| rv1133      | CGGTTCTGAATTTTCTGCTTCT | AAAGCTGAGAACCGAATCCATA   | 3       | (CG)8           | 6                             |
| 14ga1       | GTTTGCATTCTTGTGCT      | TCCTTGGGTGTGTCTACG       | 3       | (CT)25          | 30                            |
| 25ca1       | ATCGAGTGCACATTTCTGT    | TGTGATCGATGGTGCATA       | 3       | (GT)16          | 19                            |
| rv0941      | ACTTGCATAGCGTACAAGCAAA | AAAAACTGTACACTGCGCTCAC   | 4       | (CT)9           | 15                            |
| rv0454      | AGATGTGAGCTGTGTGCCTT   | CGATATATCAGCCTCACGCA     | 4       | (CT)19          | 28                            |
| rv0992      | CAATGCCATCACCAACTACT   | TTTTGTAGCATGGAGAGATTACCA | 4       | (TAA)11         | 21                            |
| rv1112      | TTTGTAGCCCGTCTTACCTA   | AACATGTGGAATGGAATGGAAT   | 5       | (CT)11          | 17                            |
| rv0757      | AGATGATGATGCAGTGGACAAG | CACCACTTCAATCACGCAGTAT   | 5       | (CT)27          | 23                            |
| rv0985-1    | CTTATTATTGCAAGCGATGGTG | GTATCGTCCCTCAGTCTTTTG    | 6       | (CT)18          | 15                            |
| rv0641      | TGCATAACTTCACTGCAGCATA | AGAAACTCGGTAGAAGGACCTC   | 6       | (CT)10          | 27                            |

**Table S4. Continued**

| SSR         | Forward primer          | Reverse primer         | Linkage | SSR motif | Number of allele <sup>a</sup> |
|-------------|-------------------------|------------------------|---------|-----------|-------------------------------|
| rv1266      | AAGAGGAAACAAATGGCAACAT  | AGCTTCCTTACATGCTCTGTAT | 6       | (CAG)10   | 11                            |
| v0005       | GGCAACTAGGAGAAAAATGAGAA | GATTGTAGTAGTGGGTAATCCT | 7       | (TAGA)22  | 21                            |
| rv0663      | ATTAGTTCAAACACCCGCAAGT  | CGTCTGCACCTCTACAGCATAG | 7       | (CT)15    | 9                             |
| rv1284      | TTTGACTATTTCTCGCACTTCG  | GAATCCGCACATATCCAAACT  | 7       | (TA)9     | 8                             |
| LPSSRH01A07 | TGGAGGGCTCGTGGAGAAGT    | CGGTTCCCACGCCTTGC      | 3       | (GT)9     | 9                             |
| LPSSRK01A11 | CGGCCACCCTTGATAGAG      | TCGTCAAGGATCCGGAGA     | 4       | (CA)21    | 15                            |
| LM15        | TCATTGGCCTGACTACCAGG    | GCATCGCCTTTCTCAGAGTG   | unknown | (GT)5     | 7                             |
| LpACT13H2   | TAACATTGATGCATGGGTTC    | ACTATTTAACTAGGATCCAAC  | 6       | (CT)35    | 43                            |
| LpACT14A4   | CATGCTTGGACACTGTTAGCC   | CTCTGTGCATATTCACGAGGG  | 5       | (CT)21    | 34                            |
| LpACT14C9   | AATGATGGCACGGAGCAATCG   | CTGTAATTCCAGGTCCTACC   | 6       | (CT)22    | 26                            |
| LpACT15H3   | GACATCCATGCAAAATGTAAG   | TCGTCACTTGCAAATATGAAC  | 2       | (CT)33    | 44                            |
| LpACT43C6   | AGCGGGAAAGATACAGCGAAG   | GAGCAAATTGGTGATCGCTAC  | 7       | (CT)29    | 17                            |
| LpACT44A7   | CACGTAGAAGCCACACTTTAC   | GTCACATTCCATTCACTTCCG  | 3       | (CT)60    | 42                            |
| LpACT44B9   | TATGCAGCTTATGGGATCTTG   | CGCATGCTGCACAATATCTGG  | 3       | (CT)38    | 23                            |
| LpHCA16B2   | TGACAGTGTAGGCTAGTGATG   | GAGTACAACATAGCAGATACC  | 4       | (CA)16    | 16                            |
| LpHCA17C6   | AACAGCATCATGGATGCTAGG   | ACGGTATGGGTATGCTGATCC  | 7       | (CA)20    | 25                            |
| LpHCA17C11  | ACCGGGACAAAGGGCTAGTAC   | CGCTCGATCGATCTGATCGTG  | 2       | (CA)23    | 28                            |
| LpHCA18F11  | TTCACATGGCATGCACAAACC   | AGGTATGACGTGCCGACATGC  | 7       | (CA)15    | 27                            |
| LpHCA20F6   | GGGTCATCAGAGATCTTGCTC   | TGCAGCTGGATGGATCAGCTC  | 4       | (CA)5     | 12                            |
| Total       |                         |                        |         |           | 2180                          |

<sup>a</sup> Identified in this study.



**Table S5.** Primers used for amplification of 14 candidate genes in perennial ryegrass.

| Putative gene         | Protein name                                 | Forward primer            | Reverse primer           |
|-----------------------|----------------------------------------------|---------------------------|--------------------------|
| <i>LpCAT</i>          | Catalase                                     | TGTTCDCCCTCCTCTTYGACGAT   | GTGGTGGTTGTTGTGGTATGC    |
| <i>LpChl Cu-ZnSOD</i> | Chloroplast copper/zinc superoxide dismutase | TCGYGGACGCYACTAAGAAG      | CAACAACACCACATGCCAGTCT   |
| <i>LpGPX</i>          | Glutathione peroxidase                       | GGTAACGATGTGAGTTTGAGCC    | GTCCCARCAGAGCTTGAATRTC   |
| <i>LpMnSOD</i>        | Manganese superoxide dismutase               | ATGGCBCTCCGCACGYTG        | CCGTTGAACTTGATGGCGCTCT   |
| <i>LpAPX</i>          | Ascorbate peroxidase                         | GCYTCATCGCCGAGAAGAAC      | CGTCCTCATCCGCAGCATAT     |
| <i>LpMDAR</i>         | Monodehydroascorbate reductase               | AGCTCTGCATCATCTCCGAA      | ACTGCCAGGACAATGTGAAGAC   |
| <i>LpDHAR</i>         | Dehydroascorbate reductase                   | CTCGGCGACTGYCCATTWC       | TTTGGTGCCCATCCAGCAAT     |
| <i>LpGR</i>           | Glutathione reductase                        | CCAAGGTYGCGATCTGCGAG      | GCAACAGCAATGCCCTGCATAA   |
| <i>LpFeSOD</i>        | Iron superoxide dismutase                    | GCBCTCACTACTCCKCCGTAT     | TGCGTAGAGTGACAGTATCCCA   |
| <i>LpCyt Cu-ZnSOD</i> | Cytosolic copper/zinc superoxide dismutase   | TTRCTAGCAGTGAGGGTGTCAA    | ATGATTCCGCAAGCAACTCGG    |
| <i>LpMAPK</i>         | Mitogen activated protein kinase             | TATATCCGCCAACTTCCCCG      | TCAATCATCACCTGCCACC      |
| <i>LpLEA3</i>         | Late embryogenesis-abundant, group 3         | ATGGCTTCTTCTTCCGTGCTGCT   | TACTCTTTGGCCGCGGCTTT     |
| <i>LpPIP1</i>         | Plasma membrane Intrinsic Protein, type 1    | ACCTTCCTCTCCTCTACGTGACCAT | AGGTGTGCTCCCTGTTGTAGATGA |
| <i>LpTIP1</i>         | Tonoplast Intrinsic Protein, type 1          | TCATCTCCACGCTCATCTTCGTCT  | CGACCCAGTACACCCACTGGTAT  |

**Table S6.** Analysis of Variance (ANOVA) of canopy and air temperature difference (CAD), chlorophyll fluorescence ( $F_v/F_m$ ), leaf water content (LWC), and leaf wilting of perennial ryegrasses across 6 environments.

| Source            | df  | CAD                  | $F_v/F_m$          | LWC                | Wilting            |
|-------------------|-----|----------------------|--------------------|--------------------|--------------------|
| Treatment (Treat) | 1   | 24.19 <sup>**a</sup> | 1.85               | 1739 <sup>**</sup> | N/A                |
| Accession (Acc)   | 178 | 3.49 <sup>**</sup>   | 6.00 <sup>**</sup> | 2.38 <sup>**</sup> | 8.16 <sup>**</sup> |
| Treat×Acc         | 178 | 1.18                 | 1.81 <sup>**</sup> | 1.34 <sup>*</sup>  | N/A                |

<sup>a</sup>Numbers used here were  $F$  statistics.

\* $P < 0.05$ ; \*\* $P < 0.01$ .

df, degree of freedom; N/A, not applicable.

**Table S7.** Summary statistics for all accessions and individual groups (G1 to G5) within the panel of perennial ryegrass accessions identified by STRUCTURE analysis.

| Statistics                  | All  | G1   | G2   | G3   | G4   | G5   |
|-----------------------------|------|------|------|------|------|------|
| Sample size                 | 192  | 121  | 21   | 25   | 13   | 12   |
| Number of alleles per locus | 20   | 15.4 | 9.2  | 10.4 | 8.2  | 7.1  |
| Major allele frequency      | 0.34 | 0.38 | 0.40 | 0.37 | 0.36 | 0.40 |
| Gene diversity              | 0.79 | 0.74 | 0.72 | 0.76 | 0.75 | 0.71 |
| Heterozygosity              | 0.50 | 0.53 | 0.47 | 0.42 | 0.50 | 0.44 |
| PIC <sup>a</sup>            | 0.76 | 0.71 | 0.69 | 0.73 | 0.73 | 0.68 |

<sup>a</sup> Polymorphism information content

**Table S8.** Number of genotypes found in 12 candidate genes of *LpChl Cu-ZnSOD*, *LpGPX*, *LpMnSOD*, *LpMDAR*, *LpDHAR*, *LpGR*, *LpFeSOD*, *LpCyt Cu-ZnSOD*, *LpMAPK*, *LpLEA3*, *LpPIP1*, and *LpTIP1* across 192 accessions of perennial ryegrass.

| <b>Genotype</b> | <b>Number</b> | <b>Frequency (%)</b> |
|-----------------|---------------|----------------------|
| A               | 8396          | 17.5                 |
| T               | 7358          | 15.3                 |
| C               | 9935          | 20.7                 |
| G               | 12077         | 25.1                 |
| C/T             | 2511          | 5.2                  |
| C/A             | 914           | 1.9                  |
| C/G             | 1498          | 3.1                  |
| A/G             | 3781          | 7.9                  |
| A/T             | 609           | 1.3                  |
| T/G             | 972           | 2.0                  |
| Total           | 48051         | 100                  |

**Table S9.** Number of associations among 14 genes and traits under drought conditions using simple linear model (S) and population structure (Q) controlled model in perennial ryegrass.

|                          | Simple model | Q Model | False positive rate under S model |
|--------------------------|--------------|---------|-----------------------------------|
| Significant associations | 20           | 6       | 70%                               |
